# Supplementary material for: Concentration-Dependent Activity of Hydromethylthionine on Cognitive Decline and Brain Atrophy in Mild to Moderate Alzheimer’s Disease
Source: PubMed Central journal article supplement (PMC6918900; doi:10.3233/jad-190772), 2019-11-26
Supplement: jad-72-jad190772-s001.pdf [file jad-72-jad190772-s001.pdf]

# Supplementary Material

## Concentration-Dependent Activity of Hydromethylthionine on Cognitive Decline and Brain Atrophy in Mild to Moderate Alzheimer's Disease

**Supplementary Table 1.** Comparison of all patients with  $C_{\max,ss}$  above or below the median for 8 mg/day

|                        | <b>A. All Patients<br/>(Split by 8 mg/day <math>C_{\max,ss}</math> median)</b> |              |                 |                        |                         | <b>B. Patients Receiving LMTM 8 mg/day<br/>(Split by 8 mg/day <math>C_{\max,ss}</math> median)</b> |              |                 |                        |                         |
|------------------------|--------------------------------------------------------------------------------|--------------|-----------------|------------------------|-------------------------|----------------------------------------------------------------------------------------------------|--------------|-----------------|------------------------|-------------------------|
|                        | <b>Difference <math>\pm</math> SEM</b>                                         | <b>CI</b>    | <b><i>p</i></b> | <b>N<sub>low</sub></b> | <b>N<sub>high</sub></b> | <b>Difference <math>\pm</math> SEM</b>                                                             | <b>CI</b>    | <b><i>p</i></b> | <b>N<sub>low</sub></b> | <b>N<sub>high</sub></b> |
| ADAS-cog               | -1.91 $\pm$ 0.59                                                               | -3.06, -0.77 | 0.0011          | 281                    | 881                     | -2.39 $\pm$ 0.72                                                                                   | -3.80, -0.98 | 0.0009          | 281                    | 285                     |
| ADCS-ADL               | 0.21 $\pm$ 0.81                                                                | -1.38, 1.81  | 0.7924          | 281                    | 878                     | 1.12 $\pm$ 0.96                                                                                    | -0.77, 3.01  | 0.2448          | 281                    | 284                     |
| LVV (cm <sup>3</sup> ) | -0.80 $\pm$ 0.30                                                               | -1.39, -0.21 | 0.0075          | 265                    | 782                     | -0.99 $\pm$ 0.37                                                                                   | -1.72, -0.27 | 0.0074          | 265                    | 254                     |
| WBV (cm <sup>3</sup> ) | 2.47 $\pm$ 0.92                                                                | 0.66, 4.28   | 0.0076          | 259                    | 780                     | 3.43 $\pm$ 1.14                                                                                    | 1.20, 5.67   | 0.0026          | 259                    | 253                     |

**Supplementary Table 2.** Comparison of patients receiving LMTM 8 mg/day with  $C_{max,ss}$  above or below the 8 mg/day median categorized by AChEI and/or memantine use status at baseline

|                        | <b>A. LMTM 8 mg/day as Monotherapy<br/>(Split by 8 mg/day <math>C_{max,ss}</math> median)</b> |              |                 |                        |                         | <b>B. LMTM 8 mg/day as Add-on Therapy<br/>(Split by 8 mg/day <math>C_{max,ss}</math> median)</b> |              |                 |                        |                         |
|------------------------|-----------------------------------------------------------------------------------------------|--------------|-----------------|------------------------|-------------------------|--------------------------------------------------------------------------------------------------|--------------|-----------------|------------------------|-------------------------|
|                        | <b>Difference ± SEM</b>                                                                       | <b>CI</b>    | <b><i>p</i></b> | <b>N<sub>low</sub></b> | <b>N<sub>high</sub></b> | <b>Difference ± SEM</b>                                                                          | <b>CI</b>    | <b><i>p</i></b> | <b>N<sub>low</sub></b> | <b>N<sub>high</sub></b> |
| ADAS-cog               | -2.75 ± 1.09                                                                                  | -4.90, -0.61 | 0.0119          | 51                     | 49                      | -2.36 ± 0.74                                                                                     | -3.81, -0.91 | 0.0014          | 230                    | 236                     |
| ADCS-ADL               | 0.52 ± 1.38                                                                                   | -2.18, 3.23  | 0.7045          | 50                     | 49                      | 1.30 ± 0.99                                                                                      | -0.63, 3.23  | 0.1869          | 231                    | 235                     |
| LVV (cm <sup>3</sup> ) | -0.82 ± 0.44                                                                                  | -1.69, 0.05  | 0.0638          | 51                     | 43                      | -1.06 ± 0.38                                                                                     | -1.80, -0.33 | 0.0047          | 214                    | 211                     |
| WBV (cm <sup>3</sup> ) | 1.07 ± 1.58                                                                                   | -2.02, 4.17  | 0.4972          | 50                     | 43                      | 4.02 ± 1.17                                                                                      | 1.73, 6.31   | 0.0006          | 209                    | 210                     |

**Supplementary Table 3A.** Baseline demographic characteristics of patients receiving LMTM 8 mg/day split by  $C_{max,ss}$  threshold of 0.373 ng/ml

|                                         | <b>LMTM 8 mg/day<br/>with <math>C_{max,ss} \leq 0.373</math><br/>ng/ml</b> | <b>LMTM 8 mg/day<br/>with <math>C_{max,ss} &gt; 0.373</math><br/>ng/ml</b> |
|-----------------------------------------|----------------------------------------------------------------------------|----------------------------------------------------------------------------|
| Age, mean (sd)                          | 66.26 (8.159)                                                              | 73.11 (7.900)                                                              |
| Age, median, (iqr)                      | 66 (60,72)                                                                 | 74 (68,79)                                                                 |
| BMI (kg/m <sup>2</sup> ), mean (sd)     | 27.22 (9.804)                                                              | 26.43 (4.422)                                                              |
| BMI (kg/m <sup>2</sup> ), median, (iqr) | 26.00 (23.05, 29.13)                                                       | 26.08 (23.48, 28.96)                                                       |
| Sex, Male, n (%)                        | 117 (59%)                                                                  | 133 (35%)                                                                  |
| Sex, Female, n (%)                      | 83 (41%)                                                                   | 244 (65%)                                                                  |
| Race                                    |                                                                            |                                                                            |
| American Indian or Alaska native, n (%) | 0                                                                          | 1 (<1%)                                                                    |
| Asian, n (%)                            | 8 (4%)                                                                     | 25 (7%)                                                                    |
| Black or African American, n (%)        | 5 (3%)                                                                     | 11 (3%)                                                                    |
| Other, n (%)                            | 3 (2%)                                                                     | 3 (1%)                                                                     |
| White, n (%)                            | 182 (92%)                                                                  | 333 (89%)                                                                  |

**Supplementary Table 3B.** Baseline clinical characteristics of patients receiving LMTM 8 mg/day split by  $C_{max,ss}$  threshold of 0.373 ng/ml

|                                   | <b>LMTM 8 mg/day with<br/><math>C_{max,ss} \leq 0.373</math> ng/ml</b> | <b>LMTM 8 mg/day with<br/><math>C_{max,ss} &gt; 0.373</math> ng/ml</b> |
|-----------------------------------|------------------------------------------------------------------------|------------------------------------------------------------------------|
| MMSE, mean (sd)                   | 21.34 (3.330)                                                          | 21.13 (3.457)                                                          |
| ADAS-cog, mean (sd)               | 20.74 (9.400)                                                          | 21.54 (9.410)                                                          |
| ADL, mean (sd)                    | 64.11 (10.147)                                                         | 62.64 (11.243)                                                         |
| WBV (cm <sup>3</sup> ), mean (sd) | 989 (106)                                                              | 934 (110)                                                              |
| LVV (cm <sup>3</sup> ), mean (sd) | 50.6 (25.8)                                                            | 49.6 (22.2)                                                            |

**Supplementary Table 3C.** Baseline clinical characteristics of patients receiving LMTM 8 mg/day split by co-medication status with AD-approved drugs

|                        | <b>A. LMTM 8 mg/day as<br/>Monotherapy</b> |           |          | <b>B. LMTM 8 mg/day as Add-on<br/>Therapy</b> |           |          | <i>p</i> |
|------------------------|--------------------------------------------|-----------|----------|-----------------------------------------------|-----------|----------|----------|
|                        | <b>Mean ± SEM</b>                          | <b>SD</b> | <b>N</b> | <b>Mean ± SEM</b>                             | <b>SD</b> | <b>N</b> |          |
| ADAS-cog               | 18.62 ± 0.98                               | 9.83      | 100      | 21.91 ± 0.43                                  | 9.32      | 466      | 0.0025   |
| ADL                    | 65.81 ± 1.13                               | 11.24     | 99       | 62.49 ± 0.50                                  | 10.88     | 466      | 0.0082   |
| LVV (cm <sup>3</sup> ) | 40.04 ± 2.16                               | 20.92     | 94       | 52.34 ± 1.14                                  | 23.59     | 425      | <0.0001  |
| WBV (cm <sup>3</sup> ) | 955.83 ± 10.57                             | 101.97    | 93       | 954.34 ± 5.58                                 | 114.27    | 419      | 0.9006   |

**Supplementary Figure 1.** Box-and-whisker plots showing the distributions of various intrinsic factors, stratified by achievement of  $C_{max,ss}$  threshold of 0.373 ng/ml in patients receiving LMTM 8 mg/day

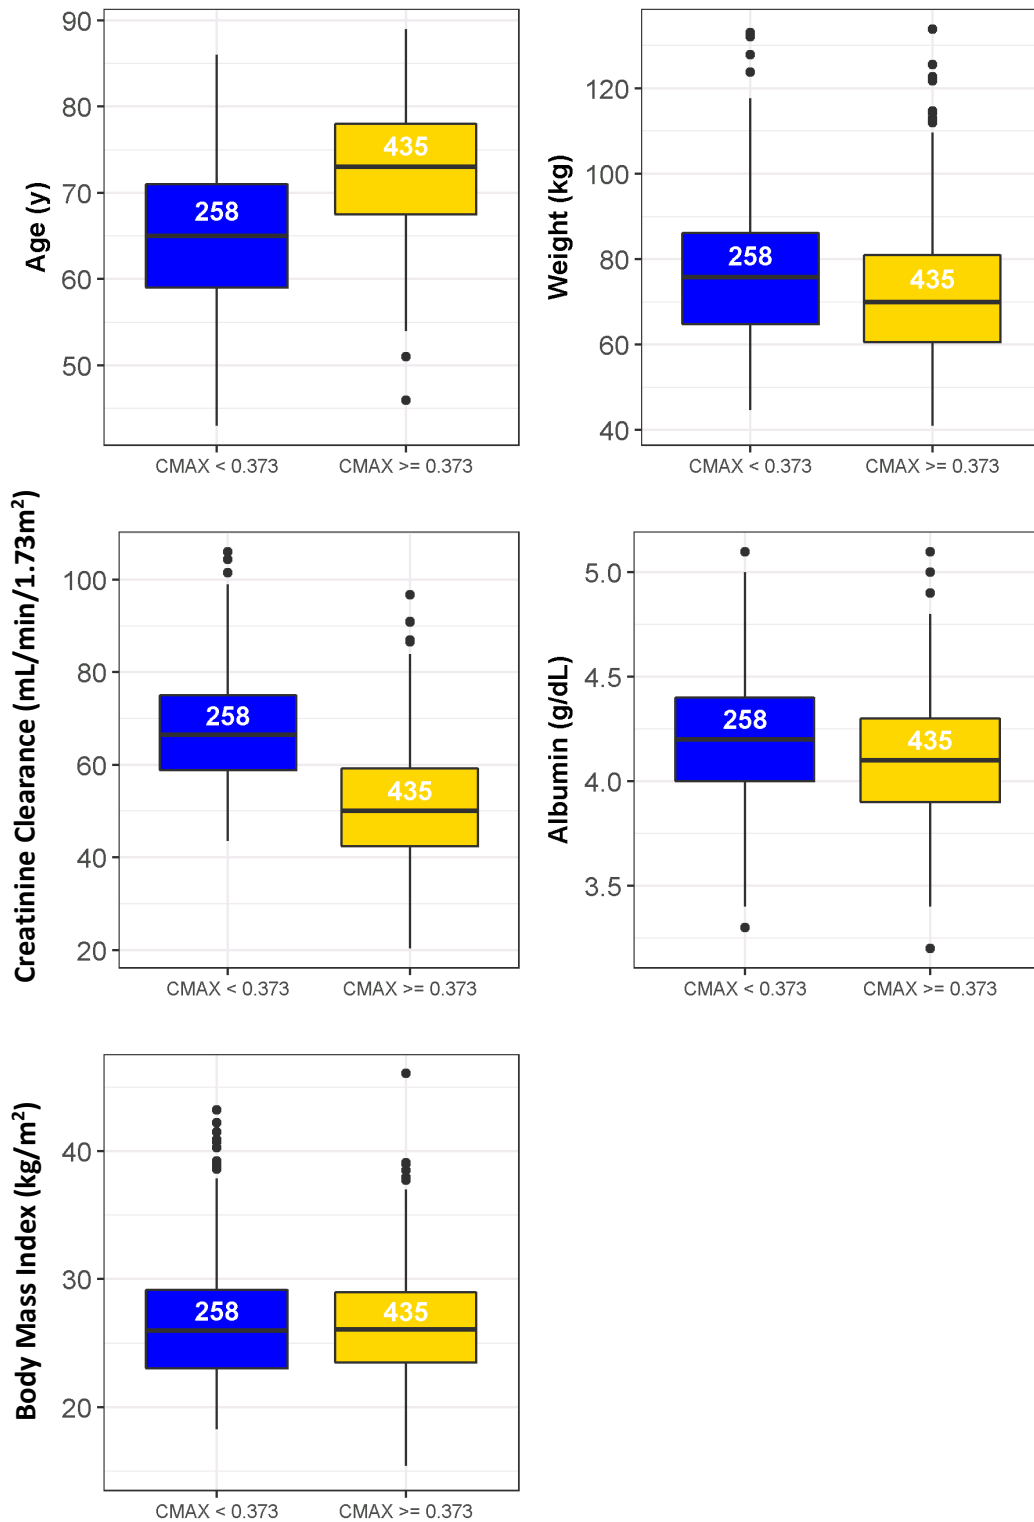

Supplementary Figure 2. Relationship between  $C_{max,ss}$  and creatinine clearance by patient sex

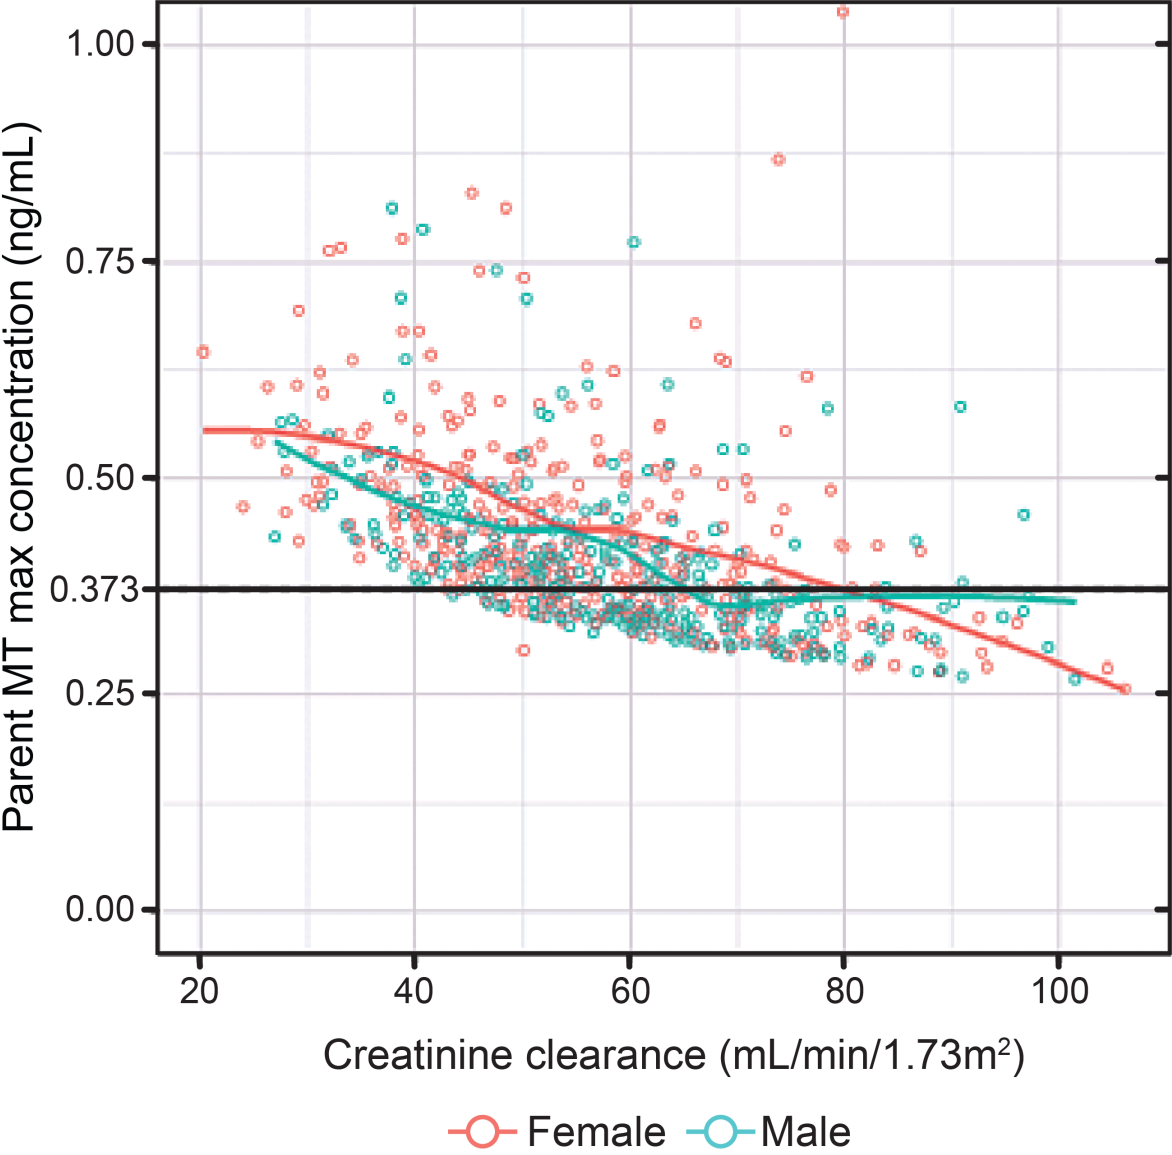

**Supplementary Figure 3A.** Probability of achieving the  $C_{\max,ss}$  threshold of 0.373 ng/mL at a dose of LMTM 8 mg/day versus creatinine clearance, overlaid on the observed data distribution

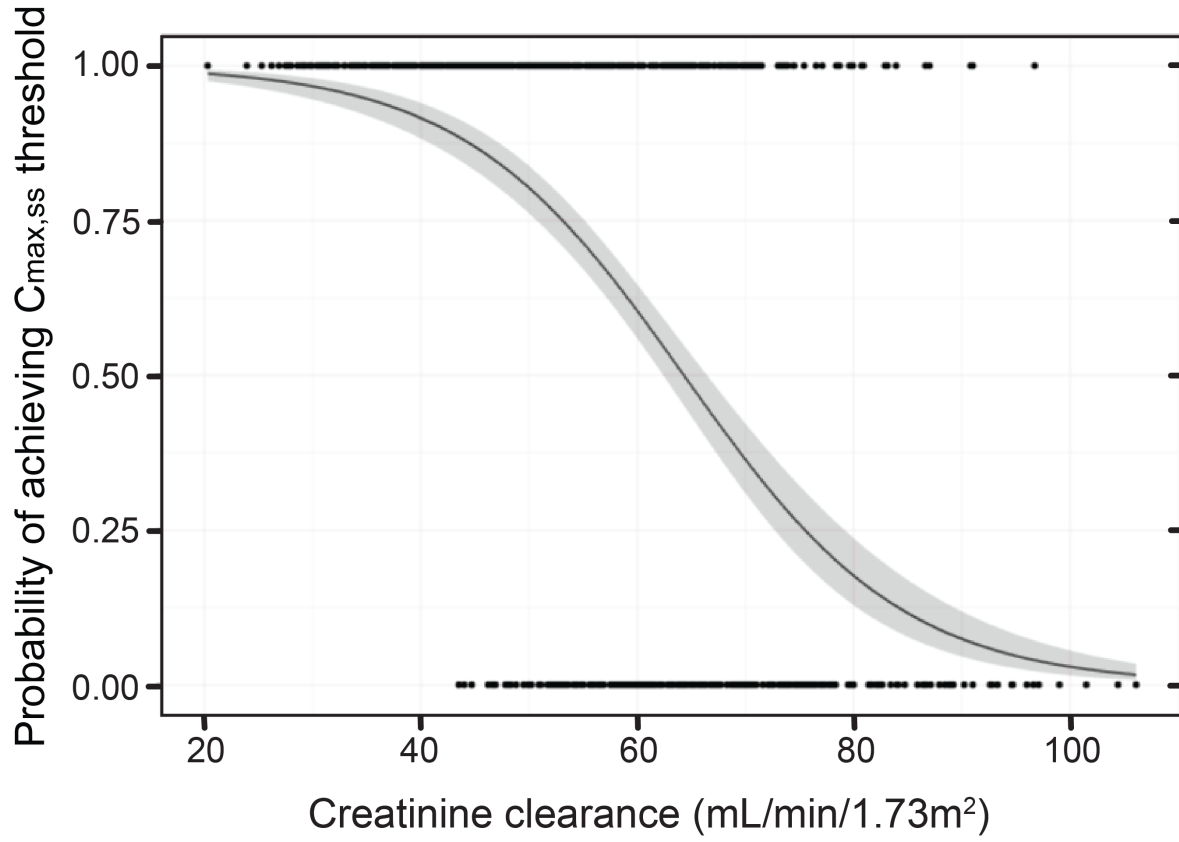

**Supplementary Figure 3B.** Expected percentage of patients with plasma levels above the 0.373 ng/mL threshold by total daily LMTM dose administered in divided doses b.i.d.

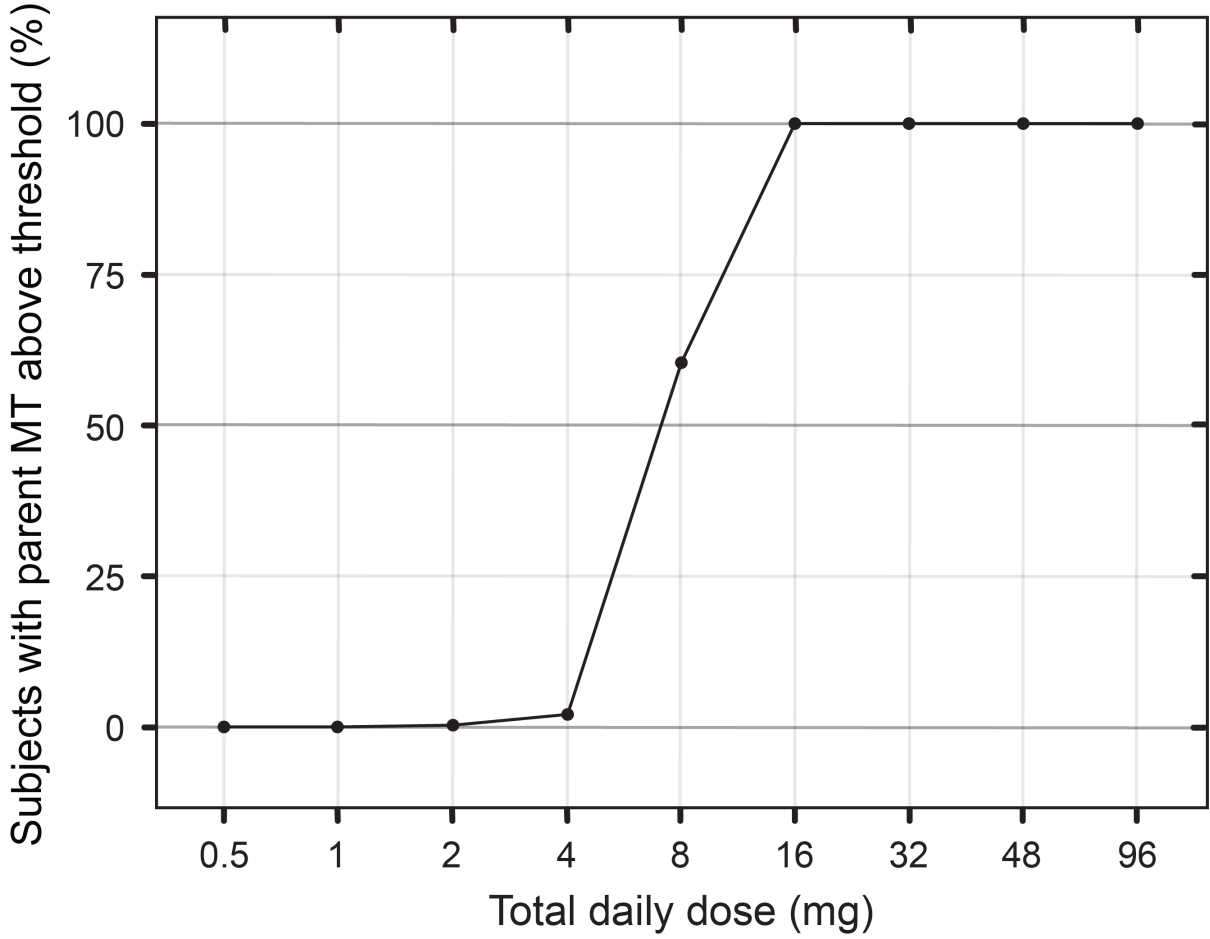

**Supplementary Table 4.** Summary of potential effect of non-AD-labelled concomitant medications (restricted to patients receiving LMTM 8 mg/day, with “high  $C_{max}$ ” indicating  $C_{max,ss} > 0.373$  ng/ml)

| <b>WHO Drug ATC Class (Level 3)</b>                         | <b>N using<br/>(% high <math>C_{max}</math>)</b> | <b>N not using<br/>(% high <math>C_{max}</math>)</b> | <b><math>\chi^2</math><br/>statistic</b> | <b><i>p</i></b> |
|-------------------------------------------------------------|--------------------------------------------------|------------------------------------------------------|------------------------------------------|-----------------|
| Lipid modifying agents                                      | 282 (65.2%)                                      | 318 (66.0%)                                          | 0.01                                     | 0.907           |
| Antithrombotic agents                                       | 239 (70.3%)                                      | 361 (62.6%)                                          | 3.44                                     | 0.064           |
| Antihypertensive/antiarrhythmic drugs                       | 200 (71.4%)                                      | 320 (60.6%)                                          | 7.26                                     | 0.007           |
| Anti-inflammatory and antirheumatic products, non-steroids  | 78 (59.5%)                                       | 316 (67.3%)                                          | 2.45                                     | 0.117           |
| Drugs for peptic ulcer and gastro-esophageal reflux disease | 127 (66.9%)                                      | 309 (65.3%)                                          | 0.05                                     | 0.816           |
| Thyroid preparations                                        | 63 (74.1%)                                       | 331 (64.3%)                                          | 2.72                                     | 0.099           |
| Blood glucose lowering drugs, excluding insulins            | 77 (66.2%)                                       | 523 (65.6%)                                          | 0                                        | 1               |
